# Supplementary material
Source: PubMed Central journal article supplement (PMC3190820)
Supplement: supp_M111.278549_jbc.M111.278549-1.pdf [file supp_M111.278549_jbc.M111.278549-1.pdf]

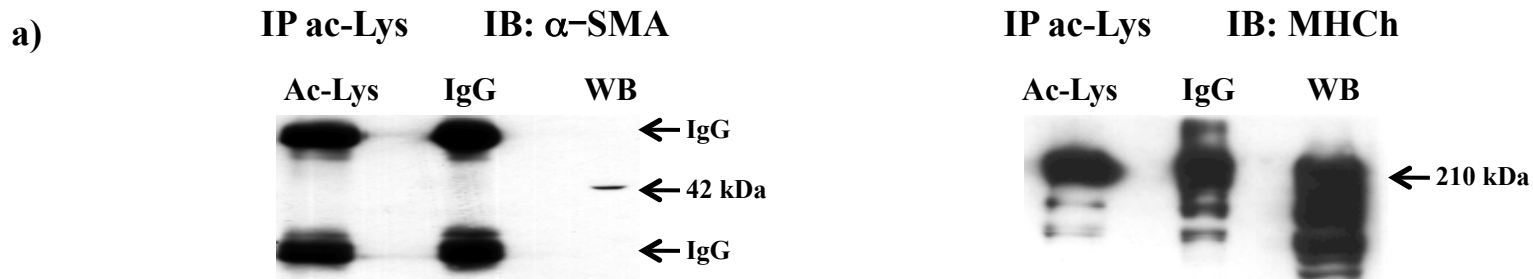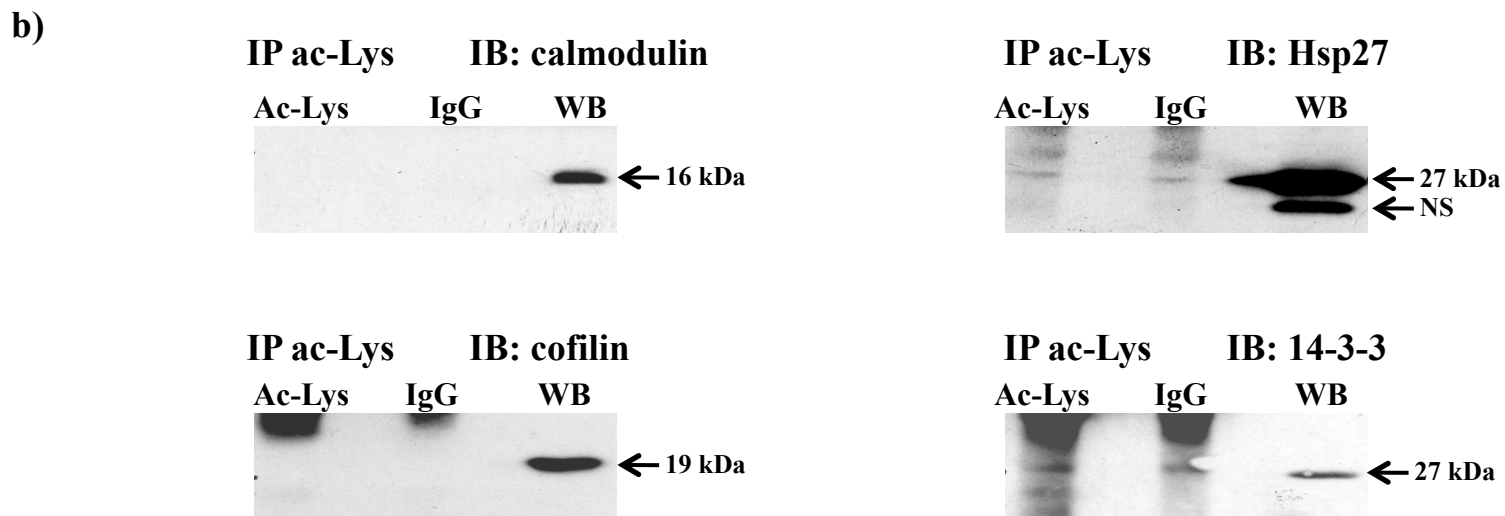

**Supplementary Figure 1: The effect of TSA on acetylation of  $\alpha$ -SMA, MHch, Calmodulin, Hsp27, Cofilin and 14-3-3**  
 NP myometrial strips were treated with TSA (3.3 $\mu$ M) for 24 hour and protein lysates subjected to immunoprecipitation with a pool of 3 acetylated  $\epsilon$ -lysine antibodies with subsequent Western blotting with **a)**  $\alpha$ -SMA and MHch antibodies and **b)** calmodulin, Hsp27, cofilin and 14-3-3 antibodies. n = 5 individual patient samples
