# Supplementary material
Source: PubMed Central journal article supplement (PMC3190820)
Supplement: supp_M111.278549_jbc.M111.278549-2.pdf [file supp_M111.278549_jbc.M111.278549-2.pdf]

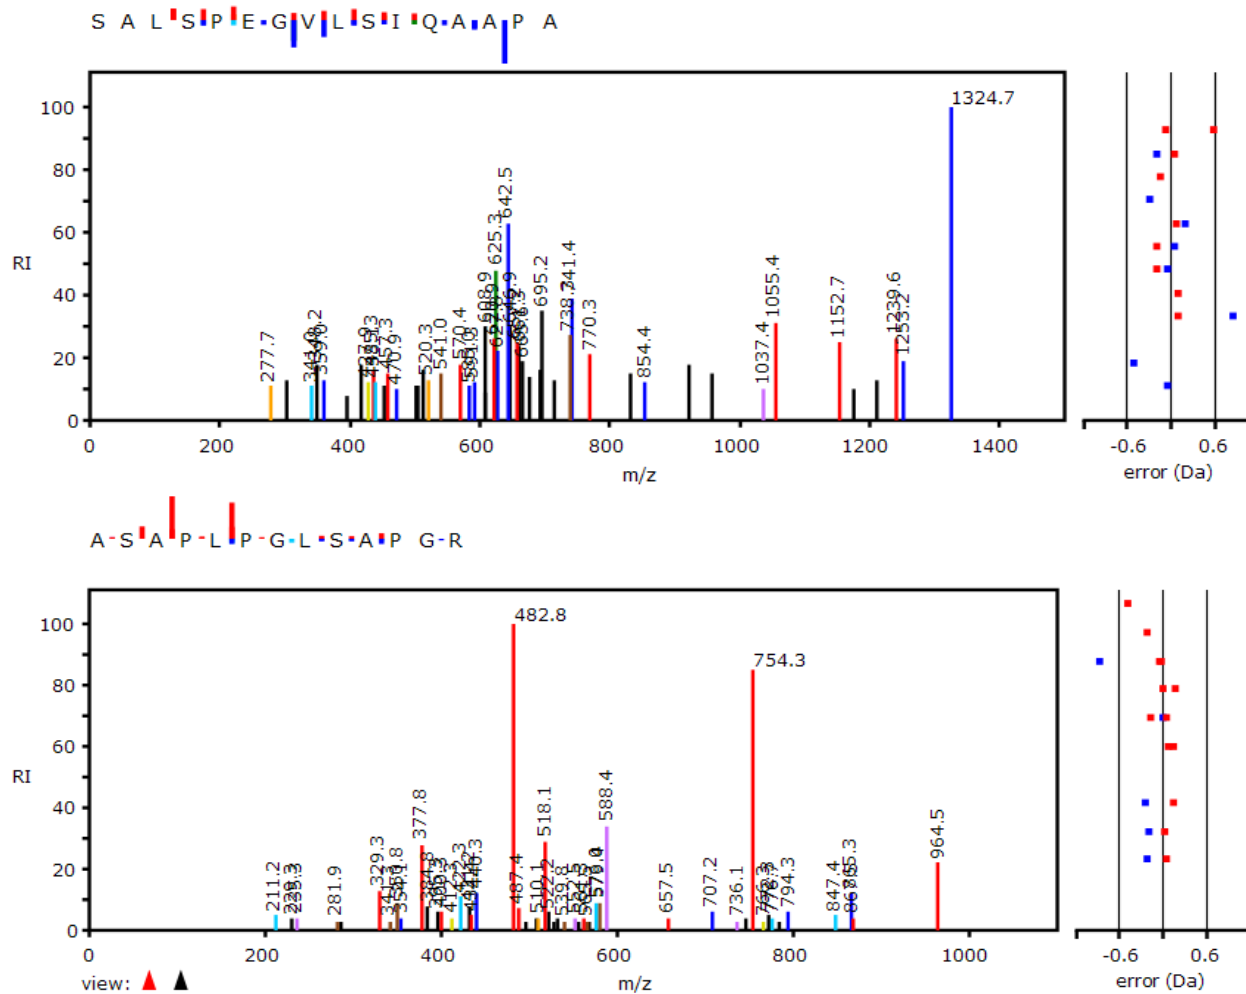

**Supplementary Figure 2. Collision-induced dissociation spectra** from an LTQ orbitrap that have led to the identification of Hsp20 in an immunoprecipitate from a P myometrial strip lysates. y-ions are depicted in red, b-ions in blue and unassigned ions in red. The sequence of the two peptides  $^{134}\text{SALSPEGVLSIQAAAPA}^{146}$  and  $^{15}\text{ASAPLPGLSAPGR}^{27}$  are on the top right of each spectrum annotated with the detected y- and b-ions with the same colour coding as in the spectra. The graphs on the right of the spectra illustrate the mass errors.
