# Supplementary material
Source: PubMed Central journal article supplement (PMC3190820)
Supplement: supp_M111.278549_jbc.M111.278549-3.pdf [file supp_M111.278549_jbc.M111.278549-3.pdf]

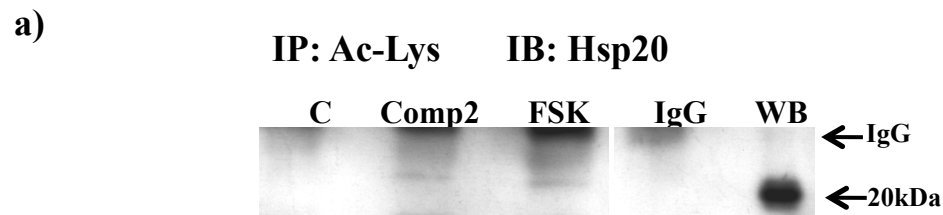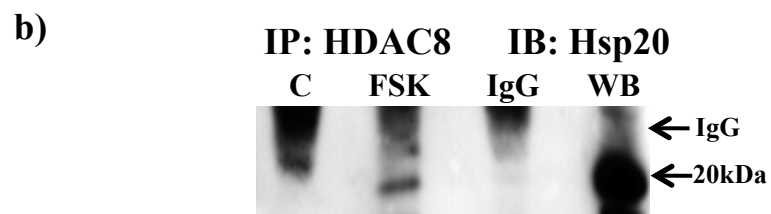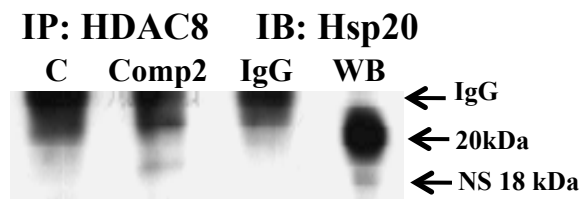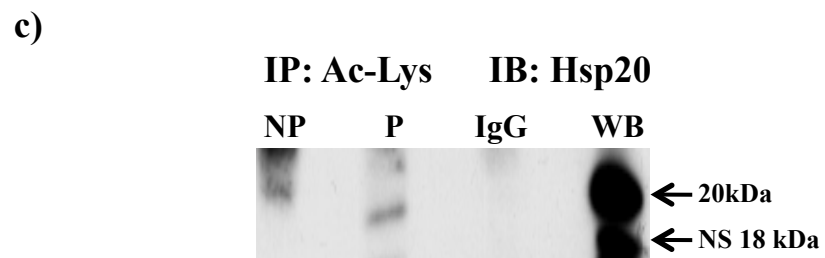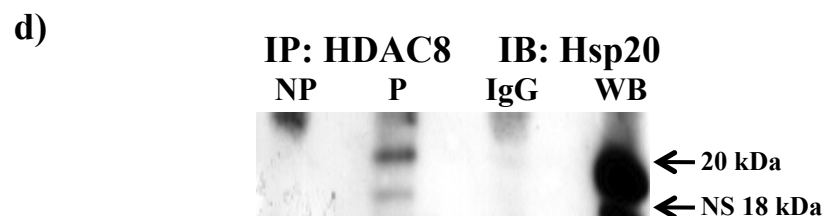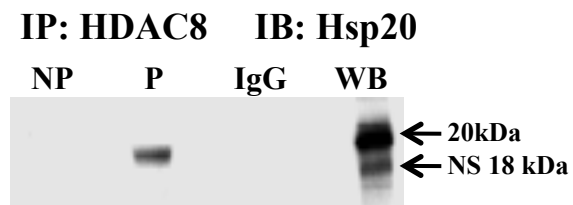

**Supplementary Figure 3:** Acetylation of Hsp20 involves inhibition of HDAC8 in myometrial tissues. See Figure 8 legend for details.
